# Supplementary material
Source: Royal Society of Chemistry journal article supplement (doi:10.1039/d5su00924c)

## Supporting Information Figures

Fig. S1

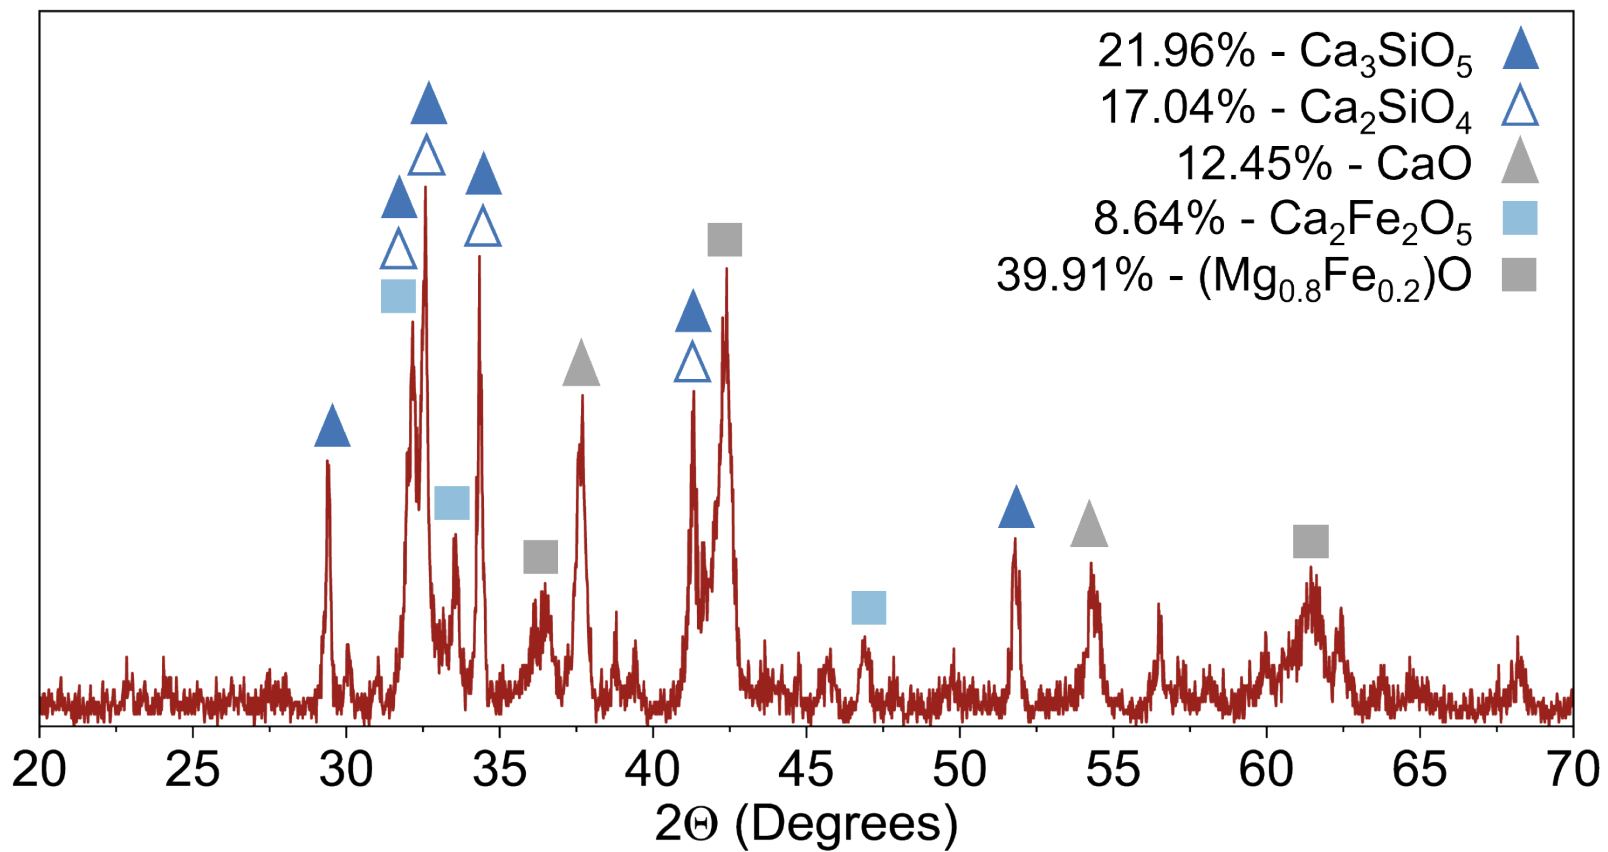

Fig. S2

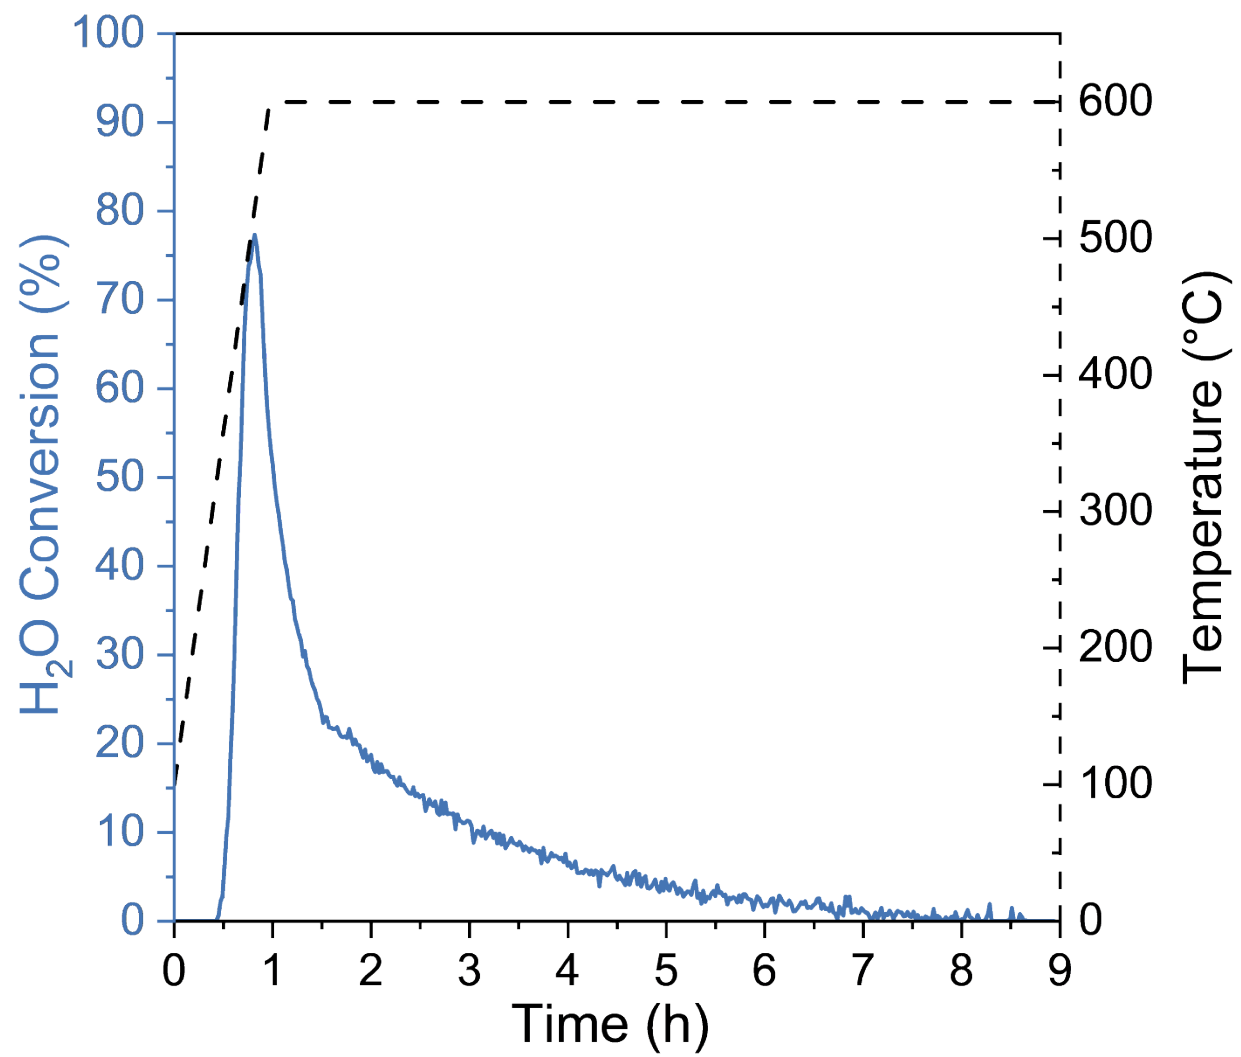

Fig. S3

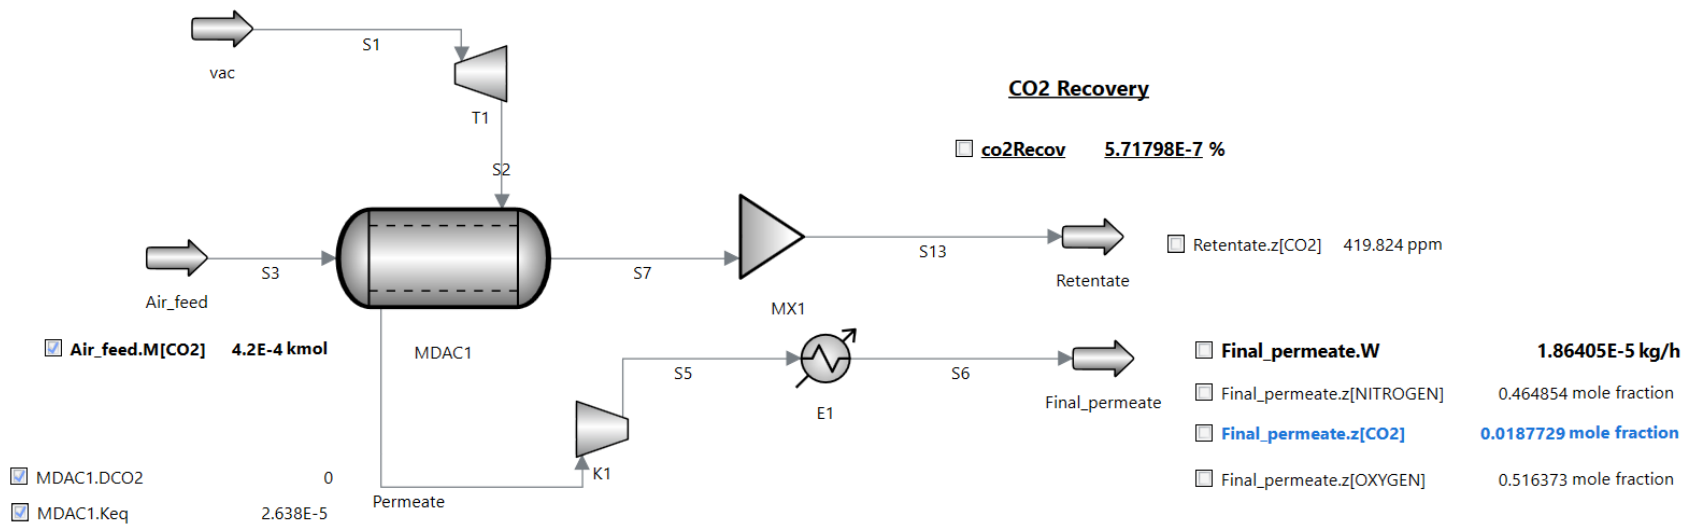

Supplement: d5su00924c2.pdf [file d5su00924c2.pdf]
